# Supplementary material
Source: PubMed Central journal article supplement (PMC3512025)

## Supplemental Figure Legends

Fig. 1. Alignment of Human MCRs, Zebrafish MCRs, and Elephant Shark MC2R. The amino acid sequences of human MC1R (AAD41355.1), MC2R (AA067714.1), MC3R (AA072726.1), MC4R (AA092061.1), MC5R (NP\_005904.1), and zebrafish MC1R (AA162848.1), MC2R (NP\_775386.1), MC3R (AA024744.1), MC4R (AAL85494.1), MC5R (NP\_775386.1), and *C. milii* MC2R (FAA704.1), and *Lampetra fluviatilis* MCR (lamprey; ABB36647.1) were aligned as described previously (37). Amino acid positions shaded in gray were identical in 75% of the taxa. N-linked glycosylation sites are underlined. A (\*) denotes an amino acid position that is in the proposed HFRW binding site of the receptor (33). Abbreviations: TM – transmembrane spanning domain; EC – extracellular loop; IC – intracellular loop.

## Fig. 2. Comparison of Selected Vertebrate Melanocortin-2 Receptor Sequences

The amino acid sequences of several melanocortin-2 receptor orthologs were aligned (36) by inserting four gaps into the alignment. Amino acid positions shaded in gray were identical in at least 75% of the sequences analyzed. Proposed N-linked glycosylation sites are underlined. The following sequences were aligned: mammals - human (hs) AA067714.1, and *Mus musculus* (mm) AA139212.1; bird - *Gallus gallus* (gg) NP\_001026686.1; reptile - *Anolis carolinensis* (ac) ( ), amphibian - *Xenopus tropicalis* (xt) XP002936118.1; teleost fishes - *Takifugi rubripes* (tr) AA024748.1, *Oreochromis mossambicus* (om) ( ), and *Danio rerio* (dr) AA024743.1; cartilaginous fish - *Callorhynchus milii* (cm) FAA00704.1.

Fig. 3. Functional expression of the Elephant Shark MC2 receptor co-transfected with Elephant shark MRAP2 and stimulated with hACTH(1-24). CHO cells were transfected with a *elephant shark mc2 receptor* cDNA construct, a *cre/luc* cDNA construct and either with or without a *elephant shark mrap2* cDNA construct. Two days post-transfection, wells containing  $1 \times 10^5$  cells were stimulated with hACTH(1-24) at concentrations ranging from  $10^{-6}$ M to  $10^{-12}$ M as described

in Methods. Results are expressed as mean $\pm$  S.E.M.; n=3. The results were normalized to the average readings for cells treated with 1 $\mu$ M hACTH(1-24).

N-terminal [-----TM1-----]

hMC1R M-----AVQGSQRRLGLSLNST-----PTAIPQLGLAANQTGARCLEVISIDGLFSLGLVSLVENALVV  
zMC1R M-----NDSSRHHFMSKHMMDMYNADNNITLNSNSTASDINVTGIAQIMIPQELFLMLGLISLVENILVV  
hMC2R MK-----HIINSYENINNTARNNSDCPRVVLPPEEIFFTTISIVGVLENILVL  
zMC2R M-----PSAESPSIHTDCAEVQVPGQVFLVIAVASLSENLLVI  
hMC3R MNAS-----CCLPSVQPTLPNGS-----EHLQAPFFSNQSSSAFCEQVFIKPEVFLSLGIVSLENILVI  
zMC3R MNDS-----HLQFLKGQKSVNST-----SLPPNGSLADSPAGTLCQEVQIQAEVFLTLGIVSLENILVI  
hMC4R MVNS-----THRGMHTSLHLWNRS---SYRLHNSAESLKGKYSDDGGCYEQLFVSPVFFVTLGIVSLENILVI  
zMC4R MNST-----HHHGLHHSFRNHSQ-----GALVVGKPSHGDRGSASGCYEQLLITVEVFLTLGIVSLENILVI  
hMC5R MNSS-----FHLHFLDLNLNAT----EGNLS-----GPNVKNKSSPFCEDMGIAVEVFLTLGIVSLENILVI  
zMC5R MHVN-----SSPASYILNATETP-----SHNKPKACEQLNIATEVFLILGIVSLENILVI  
cmMC2R MSGA-----DTSASPWLANVT-----TAVMNTSGF-----MNGSGGICRQLEIPLVYVILGGVGMLENLLVI  
LMCaR MLNSEALFPNPFVGTSGPDDNGT---ASANRT-----RFSPCHNFSIPTVEVFLALGIVSLENALVI

--] IC1 [-----TM2-----] EC1 [-----TM3-----]

hMC1R ATIAKNRNLHSPMYCFICCLALSDLLVSGSNVLETAVILLLEAGALVARAAVLQQLDNVIDVITCSSMSSLCS  
zMC1R VAIIKNRNLHSPMYFFICCLAVADMLVSVSNVVEITFLMLLTEHGLLLVTAKMLQHLDNVIDIMICSSVVSLS  
hMC2R LAVFKNKLQAPMYFFICSLAISDMGLSLYKILENILLIRNMGYLKPRGSFETTADDIIDSLFVLSLGLSI  
zMC2R VAVIKNKLHSPMYCFICNLAVENTISSFSKALENILLFKDAGRNLNRGPFELKIDDIMDSLLCMFLSSIF  
hMC3R LAVVRNGLHSPMYFFLCSLAVADMLVSVSNALETIMIAIVHSDYLTFFEDQFIQHMNIFFDSMICISLVASIF  
zMC3R SAVVKNKLHSPMYFFLCSLAAADMLVSVSNSETIVIAVLSRLLVADQLCRMHNVDSMICISLVASIC  
hMC4R VAIKKNKLHSPMYFFICSLAVADMLVSVSNSETIVITLLNSTD-TDAQSFTVNIIDNVDSVICSSLLASIC  
zMC4R AAIVKNKLHSPMYFFICSLAVADMLVSVSNSETIVVMALITGGNLTNRESIIKMNDFVDSMICISLLASIW  
hMC5R GAIVKNKLHSPMYFFVCSLAVADMLVSMSSAWETITIIYLLNKHILVIADAFVRHIDNVFDSMICISVVASMC  
zMC5R CAIVKNKLHSPMYFFVCSLAVADMLVSVSNAWETIVIYLLNTRQLVVEDHFIRQMDNVFDSMICISVVASMC  
cmMC2R IAVVNRNLHSPMYLFCISLAMADMLVSVGKASEAVI-IFLDQNSHLLTETLIDHLDYLFDSLICISLIASIL  
LMCaR AAIARNRNMHSPMYCFICSLAVADMLVSVSNAWETIIMALLQNGSLAMQEDTLKQMDNIMDSMICISVVASMC

---] IC2 [-----TM4-----] EC2 [-----TM5-----]

hMC1R FLGAIADVDRYISIFALRYHSIVTLPRARRAAIIVASVVFSTLFIAYYDHYAVLLCLVVFVFLAMLVLMVAV-  
zMC1R FLCTIAADRYITIFALRYHSIMTTQRAVGIILVVWLASITSSSLFIVYHTDNAVIAACLVTFFGVTLVPTAV-  
hMC2R SLSVIAADRYITIFHALRYHSIVTMRRTVVVLVIVWTFCTGTGTMVIFSHHVPTVITFTSLFPLMLVFLIC-  
zMC2R SILAIAVDYRYSIFHALRYHMLTMRRLVILITFIWVLCCTSGALMVGFFFAATVTIFPVLVFFTALLLILL-  
hMC3R NLLAIAVDYRVTIFALRYHSIMTVRKALTLVAIIVWCCGVCVGVFIVYSESKMIVICLIIMFFAMLLMGT-  
zMC3R NLLAIAVDYRVTIFALRYHSIVTVRRALVAIIVWLCVVCVGVFIVYSESKTVIVCLITMFFAMLVLMAT-  
hMC4R SLLSIAVDYRVTIFALRYHNIMTVKRVGIIISCIWAACVSGILFIIYSDSSAVIICLIIMFFTMLALMAS-  
zMC4R SLLAIAVDYRITIFALRYHNIMTQRRAGTIITCIWTFCTVSGVLFIVYSESTTVLICLIIMFFTMLALMAS-  
hMC5R SLLAIAVDYRVTIFALRYHNIMTARRSGAIIAGIWAFCCTGCGIVFIIYSESTYVILCLIMFFFAMFLVLS-  
zMC5R SLLAIAVDYRVTIFALRYHNIMTVRRAALIIGIWFCTGCGIVFIIYSDNTSVIVCLVSMFFMILMALAS-  
cmMC2R SLGAIATDRYLTIFHALRYHQIMTVKRAALIISALWTFCTFSGSFIKFNRRKNAFPGLITMYFTTLFVIVS  
LMCaR SLLAIAVDYRVTIFALRYHNIMTVRRAASIIGAIWAGCVVSGTLFITYWDHRTVIVCLIALFVMTMLVLMAS-

----] IC3 [-----TM6-----] EC3

hMC1R LYVHMLARACQHAQGIARLHK-----RQRPVHQGFGLKGAVTLTILLGIFFLCWGPFPLHLTLIVLCEPHPTC  
zMC1R LYLHMFILAHVHSRRITALHK-----SRRTTSMKGAITLTILLGVFIFLCWGPFFLHLILILTCPTNPYC  
hMC2R LYVHMFLLARSHTRKISTLP-----RANKMGAITLTILLGVFIFCWAPFVLHVLLMTFCSPNPYC  
zMC2R LYVHMFLLARHHANRIASMP-----GAQAQHRKSGLRGALTLTKKGVFVACWAPFSLHLLIMMICPENQYC  
hMC3R LYVHMFLLARLHVQRIALPAPAGNAPQHSCKMGAVTITILLGVFIFCWAPFVLHLVLIITCPTNPYC  
zMC3R LYVHMFLLARLHVQRIALPAPAGNAPQHSCKMGAVTISILLGVFVCCWAPFVLHLILLVSCPHPLC  
hMC4R LYVHMFLLARLHKRIAVLPG-----TGAIRQGANMKGAITLTILLGVFVVCWAPFVLHLIFVYISCPQNPYC  
zMC4R LYVHMFLLARLHMKRIALPG-----NGPIWQAANMKGAITITILLGVFVVCWAPFVLHLILMISCPQNPYC  
hMC5R LYIHMFLARTHVKRIALPAGASS-----ARQRTSMQGAVTVMMLGVFTVVCWAPFVLHLTLMLSCPRNLYC  
zMC5R LYSHMFLLARSHVQRIALPAG-----YNSIHQRASMKAAVTLTILLGIFVVCWAPFVLHLILMISCPQNPYC  
cmMC2R LYVHMFLLARRHAQCIRS-----LPGQRVHQGTSKGAITLTILLGIFII-WAPFVLHLILVLCASPNPYC  
LMCaR LYAHMFALARSHAQRISAQP---RSSRQGGQGAASLKGAVTLLSILLGVFVVCWAPFVLHLTLTIISCPANPYC

[-----TM7-----] C-terminal

hMC1R GCIFKNFNLFLALIIICNAIIDPLIYAFHSQELRRTLKEVLTCSW  
zMC1R KCYFSHFNLFLILIIICNSLIDPLIYAYRSQELRRTLKELIFCSWCFVAV  
hMC2R ACYMSLQVNGMLIMCNAVDPPIYAFRSPELRDAFAKMKIFCSRYW  
zMC2R ECYRSFLQLHVLLVSHAVIDPAINAFRSVELRNTYKQQLSSASRICKRCA  
hMC3R ICYTAHFNTYLVLIMCNSVIDPLIYAFRSLELRNTFFRILCGCNGMNLG  
zMC3R LCYMSHFNTYLVLIMCNSVIDPLIYACRSLEMRKTFKEI-LCCFGCQPAL  
hMC4R VCFMSHFNLYLILIMCNSVIDPLIYALRSQELRRTFKEI-ICCYPLGGLCDLSSRY  
zMC4R VCFMSHFNMYLILIMCNSVIDPLIYAFRSQEMRKTFFKEI-CCWYGLASLCV  
hMC5R SRFMSHFNMYLILIMCNSVMDPLIYAFRSQEMRKTFFKEI-ICCRGFRIACSFPRRD  
zMC5R MCFMSHFNMYLILIMCNSVIDPLIYAFRSQEMRKTFFKEI-ICCYSLRNVFVGMSR  
cmMC2R TCYMSLQVDLILIMCNSIIDPLIYAFRSPELRNTFFKMKCICFNKQLY  
LMCaR CAYIAYFPLYLLIMINSVIDPLIYAFRSPELRVLIIRDTLRKCGRGRGRGANGTRGSSCCCVQVR

|        | N-terminal                                                                 | [-----TM1-----] | IC1             |                 |
|--------|----------------------------------------------------------------------------|-----------------|-----------------|-----------------|
| hsMC2R | MK-----HIINSYENINNTARNNSDCPRVVLPEEIFFTISIVGVLENLIVLLAVFKNKNLQAPM           |                 |                 | 74              |
| mmMC2R | MK-----HIINSYEHTNDTARNNSDCPDVVLPEEIFFTISVIGILENLIVLLAVIKNKNLQSPM           |                 |                 |                 |
| ggMC2R | MSTKPFNLILSAHAGQTSIPLENITDFSLNITDCNQVVVPEEVFFTVAAAGILENLLVLVAVIRNKNLHSPM   |                 |                 |                 |
| acMC2R | MS-----NAVNTSDCAPVVVPEEIFFIATLGLKENLLVLIAGVGRNKNLHSPM                      |                 |                 |                 |
| xtMC2R | MK-----NVTILSVNSTKCSVHVPEVVYLTVSAIGLLENLLVLAVIKKNLHSPM                     |                 |                 |                 |
| trMC2R | M-----NATTVNRSDCPEVNVPIHVFFTIGFVSLLENLLVIGAI SWNRNLHSPM                    |                 |                 |                 |
| omMC2R | M-----NDVSALPSNHTDCQVVKVPHLVFLVLMVSLSENLLVVAVVRNKNLHSPM                    |                 |                 |                 |
| daMC2R | M-----PSAESPSSTHTDCAEVQVPGQVFLVIAVASLSENLLVIVAVIKNKNLHSPM                  |                 |                 |                 |
| cmMC2R | MS---GADTSASPWLANVTTAVMNTSGFMNGSGGICRQLEIPLVYVYLILGGVGMLENLLVIAVNNRNLHSPM  |                 |                 |                 |
|        | [-----TM2-----]                                                            | EC1             | [-----TM3-----] | IC2             |
| hsMC2R | YFFICSLAISDMLGSLYKILENIIILRNMGYLPKPGSFETTADDIIDSFLVLSLLGSIFSLSVIAADRYITI   |                 |                 | 148             |
| mmMC2R | YFFICSLAISDMLGSLYKILENIIIFRNMGYLPKPGSFESTADDIIDCFILSLGSLFSLSVIAADRYITI     |                 |                 |                 |
| ggMC2R | YFFICSLAISDMLGSLYKILENIIILCKMGYLTRRGDFEKKLDDAMD SMFILSLLGSIFSLLAIAADRYITI  |                 |                 |                 |
| acMC2R | YIFICSLAVSDMLGSLYKAVENIFYIIFCKMQVVKCRGKLAKTMDIDLDFMILSLLGSIFSLSAIAADRYITI  |                 |                 |                 |
| xtMC2R | YFFICSLAVSDMLFSLYKILETIIILANIGFLDRNGPFKMDVMDWIFVLSLLGSIFSLSAIAADRYITV      |                 |                 |                 |
| trMC2R | YCFIGSLAAFNTVASVTKTWNEMITFAEVGHLRKGVSERKADDVDSLCSMFLGSIFSLAIAADRYITI       |                 |                 |                 |
| omMC2R | YMFICSLATFNTISSLSKTWETLMMEFSDVQQLDSRGSVRRVDDIIDALLCMSFIGCICSF LAIAVDRYVTI  |                 |                 |                 |
| drMC2R | YCFICNLAVFNTISSFSKALENILLFKDAGRLNLRGPFELKIDIDMSLLCMCFSSIFSLAIAVDRYISI      |                 |                 |                 |
| cmMC2R | YLFICSLAMADMLVSVGKASEAVI--IFLDQNSHLLTETLIDHLDYLFDSLICISLIASILSLGAIATDRYITI |                 |                 |                 |
|        | [-----TM4-----]                                                            | EC2             | [-----TM5-----] |                 |
| hsMC2R | FHALRYHSIVTMRRTVVVLTVIWTFCTGTGITMVIFSHHVPTVITFTSLFPIMLVFILC-LYVHMFLLARSHR  |                 |                 | 222             |
| mmMC2R | FHALQYHSIVTMRRTIITLTIWTFCTGSGITMVIFSHHIPVTLTFTSLFPIMLVFILC-LYIHMFLARSHAR   |                 |                 |                 |
| ggMC2R | FYALRYHNIMTLQRALVILAIWTFPCAGSIAIALFSHEVATVPTLFPIMMIFILC-LYIHMFLARSHAK      |                 |                 |                 |
| acMC2R | FYALRYHNIMTLKRALVMLGVIWAFCTGSGIAMVLFSEYAVTVVSTVLFVCFMILILC-LYIHMFLARSHAK   |                 |                 |                 |
| xtMC2R | FHALHYHNIMTVKRASVILAVIWFCTGGSGIAIMLFHDTAMIICLTVMFLLLVIVC-LYIHMFLARSHAK     |                 |                 |                 |
| trMC2R | FHALRYHNIMTMQRTGAILGLIWTFCGVSAMLMVRFSDNLIMSCFVVFIIISLAIYI-LYVYMFILARVHAR   |                 |                 |                 |
| omMC2R | FHALRYHNIMTRRAAALAGI WALCGVAGAMVAFCEATVIKIFFIVLFLISLLILF-LYVHMFLLARSHAR    |                 |                 |                 |
| drMC2R | FHALRYHMLMTRRVLIIILFTIWLCTGSLGILGLFICWSPFLVHLLLVLCRYNRYCACYLSMLNVTLLIF     |                 |                 |                 |
| cmMC2R | FHALRYHQIMTVKRAALIIISALWTFCTFGSGSFIKFNRRKNAPGSLITMYFTLFLVIVSLYVYMFLLARHAQ  |                 |                 |                 |
|        | IC3                                                                        | [-----TM6-----] | EC3             | [-----TM7-----] |
| hsMC2R | KISTLP-----RANMKGAILTLTILLGVFIFCWAPFVLHVLLMTFCPSNPYCACYMSLFQVNGMLIMC       |                 |                 | 296             |
| mmMC2R | KISTLP-----RTNMKGAMTLTILLGVFIFCWAPFVLHVLLMTFCPNNPYCVCYMSLFQVNGMLIMC        |                 |                 |                 |
| ggMC2R | KIASLP-----TSAVHQRTNMKGAILTLIFLGVFLCCWAPFVLHILLARFCPHNPYCACYMSIFHVNGTLMC   |                 |                 |                 |
| acMC2R | KIA-----LMTTSSVHQGANMKGAILTLVLAVALFVWSPFLVHMLLMTFCPQNPYCYGSIHVVHGMIMC      |                 |                 |                 |
| xtMC2R | KIASL----SQQWNSVQQRANINGAITLTLILLGLFICWSPFLVHLLLVLCRYNRYCACYLSMLNVTLLIF    |                 |                 |                 |
| trMC2R | KIAALPNGSGKHQHQRWRWGHGMRGILTLTILFGAFVWVWAPFHLHILFMACPMNPYCECYRSMFQLHLVLLMS |                 |                 |                 |
| omMC2R | KIAALP-----GSAMPHRSLRGALTLTMLFGVFWVWVWAPFHLHLLLMVVCVENPYCECYRSLFQLNLVLLMS  |                 |                 |                 |
| drMC2R | RIASMP-----GAQAQHRKSGLRGALTLTIKKGVEVACWAPFSLHLLIMMCPENQYCECYRSLFQLHVLLVLS  |                 |                 |                 |
| cmMC2R | CIRSLP-----GQRVHQGTSLKGAITLTLILGIFII-WAPFHLHLLVLCPSNPYCTCYMSLFQVDLILIMC    |                 |                 |                 |
|        | -----]                                                                     | C-terminal      |                 |                 |
| hsMC2R | NAVIDPFIYAFRSPELRDAFKKMIFCSRYW                                             |                 |                 | 355             |
| mmMC2R | NAVIDPFIYAFRSPELRDAFKRMLFCNRY                                              |                 |                 |                 |
| ggMC2R | NAIDPMIFAFRSPELRSTFKKMFCCARYNWNWKLNEGEYYRSTPMQHFFAELKILT                   |                 |                 |                 |
| acMC2R | NAVIDPMIYAFRSPELRSTFRRLFCCHKPNWT                                           |                 |                 |                 |
| xtMC2R | SSVIDPLIYAFRSPELRNTFKKMLCCWMTM                                             |                 |                 |                 |
| trMC2R | HALIDPVIYAFRIPELRHTFRMLPCLNWRWR                                            |                 |                 |                 |
| omMC2R | HAVVDPAIYAFRSAELRNTFRKMLFCSDSPLCYKVKALFH                                   |                 |                 |                 |
| drMC2R | HAVIDPAINAFRSVELRNTYKQLLSSASRICKRCA                                        |                 |                 |                 |
| cmMC2R | NSIIDPLIFAFRSPELRNTFKKMCICFNKQLY                                           |                 |                 |                 |

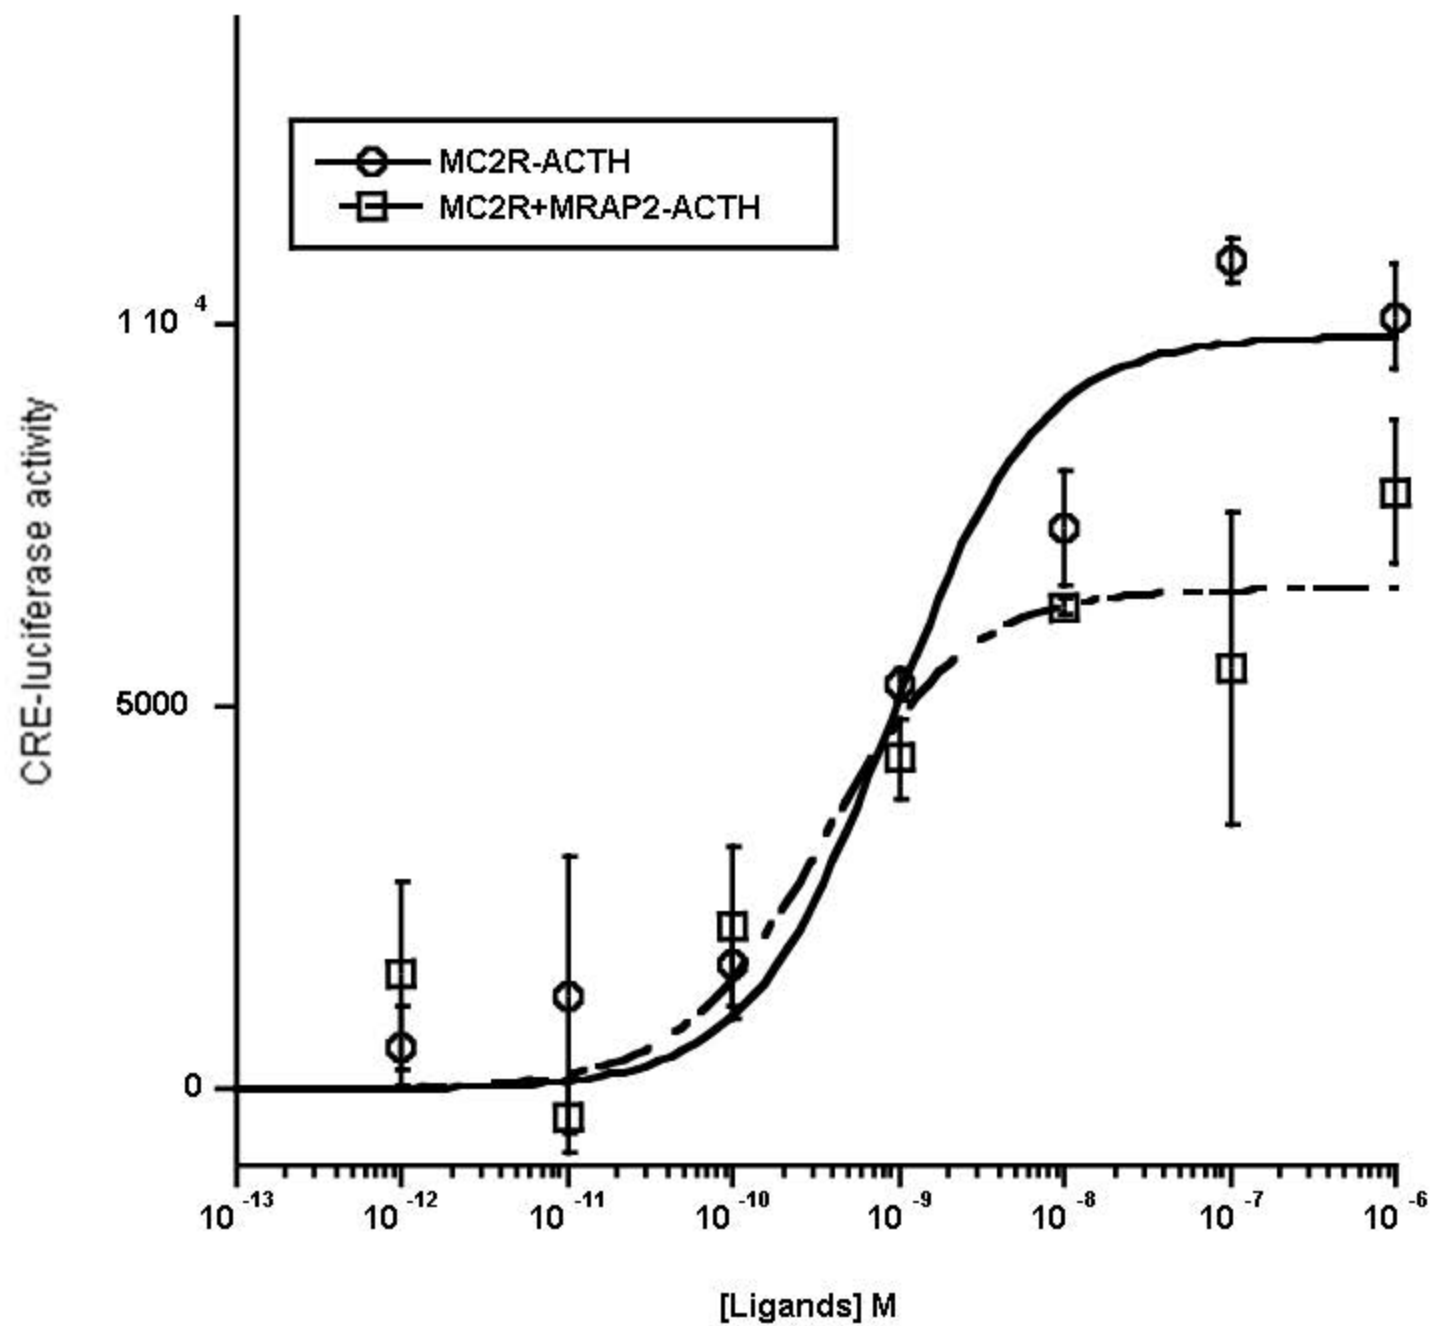

Supplement: supp_en.2012-1482v1_en-12-1482.pdf [file supp_en.2012-1482v1_en-12-1482.pdf]
